# Supplementary material
Source: PubMed Central journal article supplement (PMC7848977)
Supplement: AAC.01778-20-s0001.pdf [file AAC.01778-20-s0001.pdf]

1 **Supplemental material to “Population pharmacokinetics and exposure-response analysis of**  
2 **tribendimidine to improve treatment for children with hookworm infection”**

3

4 *Janneke M. Brussee, Noemi Hiroshige, Anna Neodo, Jean T. Coulibaly, Marc Pfister\*, Jennifer Keiser\**

5 \*Authors contributed equally.

6

7 **Corresponding author:** Jennifer Keiser, Swiss Tropical and Public Health Institute, Department of Medical  
8 Parasitology and Infection Biology, Socinstrasse 57, 4051 Basel, Switzerland, [jennifer.keiser@swisstph.ch](mailto:jennifer.keiser@swisstph.ch).

9

10

11

12 Contents supplemental material

13 Table S1. Patient and study characteristics

14 Table S2. Model development history

15 Figure S1. Model structure

16 Figure S2. Goodness-of-fit plots dADT

17 Figure S3. Goodness-of-fit plots adADT

18 Figure S4. Visual predictive check of dADT and adADT

19 Figure S5. Intestinal residence time as predictor for efficacy

20 Figure S6. Evaluation of exposure-response analysis results

21 Figure S7. Molecular structures of Tribendimidine, dADT, and adADT

22

23

1 **Table S1.** Patient and study characteristics.

|                                | All                 | Placebo<br>(children) | 100 mg<br>(children) | 200 mg<br>(children) | 400 mg<br>(children) | 400 mg<br>(adolescents) |
|--------------------------------|---------------------|-----------------------|----------------------|----------------------|----------------------|-------------------------|
| <b>N</b>                       | 155                 | 32                    | 34                   | 36                   | 34                   | 19                      |
| <b>Samples</b>                 | 2347                | 0                     | 679                  | 660                  | 640                  | 368                     |
| <b>Sex (M/F)</b>               | 108/47              | 21/11                 | 21/13                | 27/9                 | 25/9                 | 14/5                    |
| <b>Tablets</b>                 | 50/200 mg           | placebo               | 2x 50 mg             | 1x 200 mg            | 2x 200 mg            | 2x 200 mg +<br>placebo  |
| <b>Age (y)*</b>                | 10 (6-18)           | 9 (6-12)              | 9 (6-12)             | 9 (6-13)             | 8.5 (6-12)           | 15 (15-18)              |
| <b>Weight (kg)*</b>            | 26 (12-65)          | 27 (12-40)            | 26 (18-42)           | 24.5 (14-38)         | 23 (14-36)           | 48.5 (30-65)            |
| <b>Height (cm)*</b>            | 130 (95-167)        | 131 (106-149)         | 128 (95-155)         | 129 (105-147)        | 123.5 (96-152)       | 159 (131-<br>167)       |
| <b>BMI (kg/m<sup>2</sup>)*</b> | 15.4 (9.6-26.6)     | 15.9 (9.8-24.9)       | 15.1 (12.5-26.6)     | 14.9 (9.6-22.3)      | 14.7 (12.0-26.0)     | 18.9 (14.8-<br>24.0)    |
| <b>Malaria (y/n)</b>           | 57/79               | 13/19                 | 17/17                | 14/22                | 13/21                | NA                      |
| <b>Temperature (°C)*</b>       | 36.7<br>(35.5-38.3) | 36.7<br>(35.5-37.4)   | 36.6<br>(35.7-37.2)  | 36.7<br>(35.5-38.3)  | 36.7<br>(35.6-37.5)  | 36.9<br>(36.5-37.3)     |
| <b>Heart rate*</b>             | 97 (55-152)         | 98 (60-126)           | 92 (63-140)          | 97 (55-138)          | 100 (67-152)         | NA                      |
| <b>Creatinine (mg/L)*</b>      | 32 (1-56)           | 31 (3-45)             | 34 (1-56)            | 30.5 (2-55)          | 34.5 (2-53)          | NA                      |
| <b>Urea (g/L)*</b>             | 43.5 (34-71)        | 41 (34-64)            | 41.5 (36-68)         | 46 (35-71)           | 48 (34-70)           | NA                      |
| <b>Azotemia (g/L)*</b>         | 5 (1-19)            | 4 (1-15)              | 6 (1-19)             | 4 (1-14)             | 4 (1-18)             | NA                      |
| <b>AST (UI/L)*</b>             | 41 (16-59)          | 41 (19-53)            | 40.5 (16-56)         | 42 (23-57)           | 42 (16-59)           | NA                      |
| <b>ALT (UI/L)*</b>             | 33 (11-61)          | 34.5 (12-48)          | 32.5 (11-57)         | 32.5 (14-53)         | 33.5 (15-61)         | NA                      |
| <b>Bilirubin (mg/L)*</b>       | 31.5 (1-56)         | 34.5 (3-51)           | 28 (1-55)            | 32 (7-53)            | 30 (5-56)            | NA                      |
| <b>Infection intensity</b>     | Light-<br>Moderate  | Light                 | Light                | Light                | Light                | Light-<br>Moderate      |
| <b>Egg reduction (%)</b>       | -                   | 34                    | 39                   | 49                   | 68                   | 74                      |
| <b>Cured (%)</b>               | -                   | 22                    | 21                   | 36                   | 50                   | 53                      |

2 \*median (range). BMI: body mass index. M/F: male/female. NA not available.

3

4

5

1 **Table S2.** Model development history

| Model description                                                                                                                                                                                                                                                                                                                                                                                                                                                                                                 | Study population                     | OFV   | ΔOFV |
|-------------------------------------------------------------------------------------------------------------------------------------------------------------------------------------------------------------------------------------------------------------------------------------------------------------------------------------------------------------------------------------------------------------------------------------------------------------------------------------------------------------------|--------------------------------------|-------|------|
| dADT: first-order absorption, two compartment distribution, linear elimination, no covariates                                                                                                                                                                                                                                                                                                                                                                                                                     | School-aged children                 | 7804  | X    |
| As previous + allometric scaling (correlating body weight to all clearance and volume parameters with exponents of 0.75 and 1, respectively)                                                                                                                                                                                                                                                                                                                                                                      | School-aged children                 | 7786  | -18  |
| As previous + 4 transit compartments for delayed absorption                                                                                                                                                                                                                                                                                                                                                                                                                                                       | School-aged children                 | 7602  | -184 |
| As previous + tablet formulation as covariate on absorption rate constant                                                                                                                                                                                                                                                                                                                                                                                                                                         | School-aged children                 | 7575  | -211 |
| As previous + addition of adADT data, assumption of 65% formation, two-compartments for distribution, linear elimination. Best model so far: <ul style="list-style-type: none"> <li>- First-order absorption with four transit compartments,</li> <li>- Two compartments for distribution of dADT,</li> <li>- Linear elimination of dADT, of which 65% formation of adADT,</li> <li>- Two compartment for distribution of adADT,</li> <li>- linear elimination of adADT</li> <li>- allometric scaling.</li> </ul> | School-aged children                 | 11755 | X    |
| Model as above with re-estimation of all PK parameters based on PK data of school-aged children and adolescents                                                                                                                                                                                                                                                                                                                                                                                                   | School-aged children and adolescents | 30124 | X    |
| Addition of Sterling approximation estimating the number of transit compartments                                                                                                                                                                                                                                                                                                                                                                                                                                  | School-aged children and adolescents | 30070 | -54  |
| Removal of IIV parameter for $V_{\text{central,adADT}}$ (to increase model stability)                                                                                                                                                                                                                                                                                                                                                                                                                             | School-aged children and adolescents | 30069 | -1   |
| Volume of adADT peripheral compartment equalized to volume of its central compartment (to increase model stability)                                                                                                                                                                                                                                                                                                                                                                                               | School-aged children and adolescents | 30210 | +140 |
| Addition of IIV parameter for bioavailability                                                                                                                                                                                                                                                                                                                                                                                                                                                                     | School-aged children and adolescents | 30170 | -40  |
| Addition of tablet formulation as covariate on absorption rate constant                                                                                                                                                                                                                                                                                                                                                                                                                                           | School-aged children and adolescents | 30089 | -81  |

2 OFV: Objective function value.

3

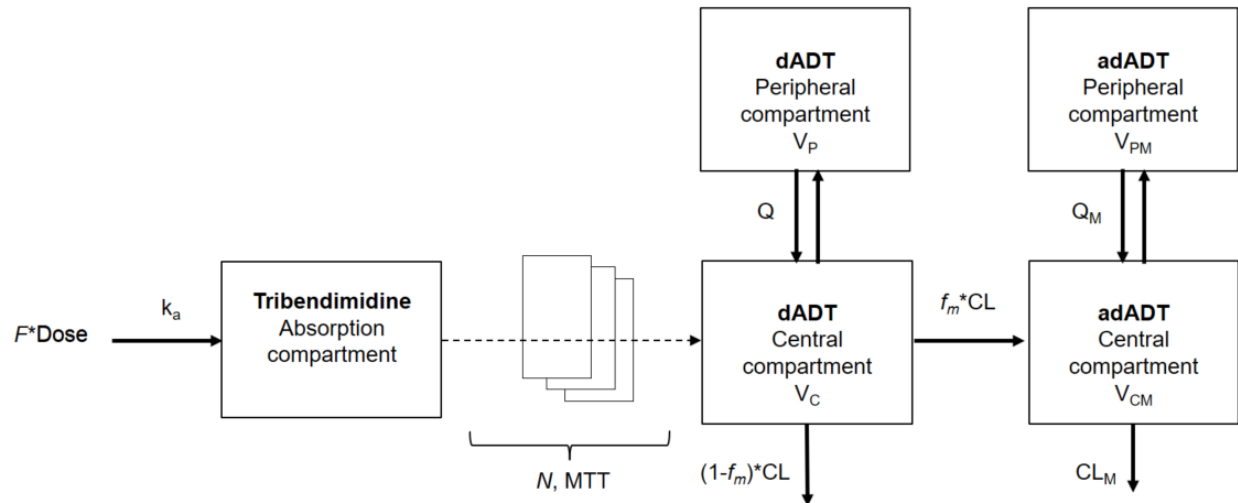

1  
 2 **Figure S1.** Schematic presentation of the model structure.  $F$ : bioavailability,  $k_a$ : absorption rate constant,  
 3  $N$ : estimated number of transit compartments,  $MTT$ : mean transit time,  $dADT$ : primary metabolite,  $V_C$  and  
 4  $V_P$ : volume of distribution of the central and peripheral compartment,  $Q$ : inter-compartmental clearance,  
 5  $CL$ : clearance,  $f_m$ : fraction metabolized into  $adADT$  (secondary metabolite). All PK parameters describing  
 6 the secondary metabolite  $adADT$  are indicated with the subscript  $M$ .

7

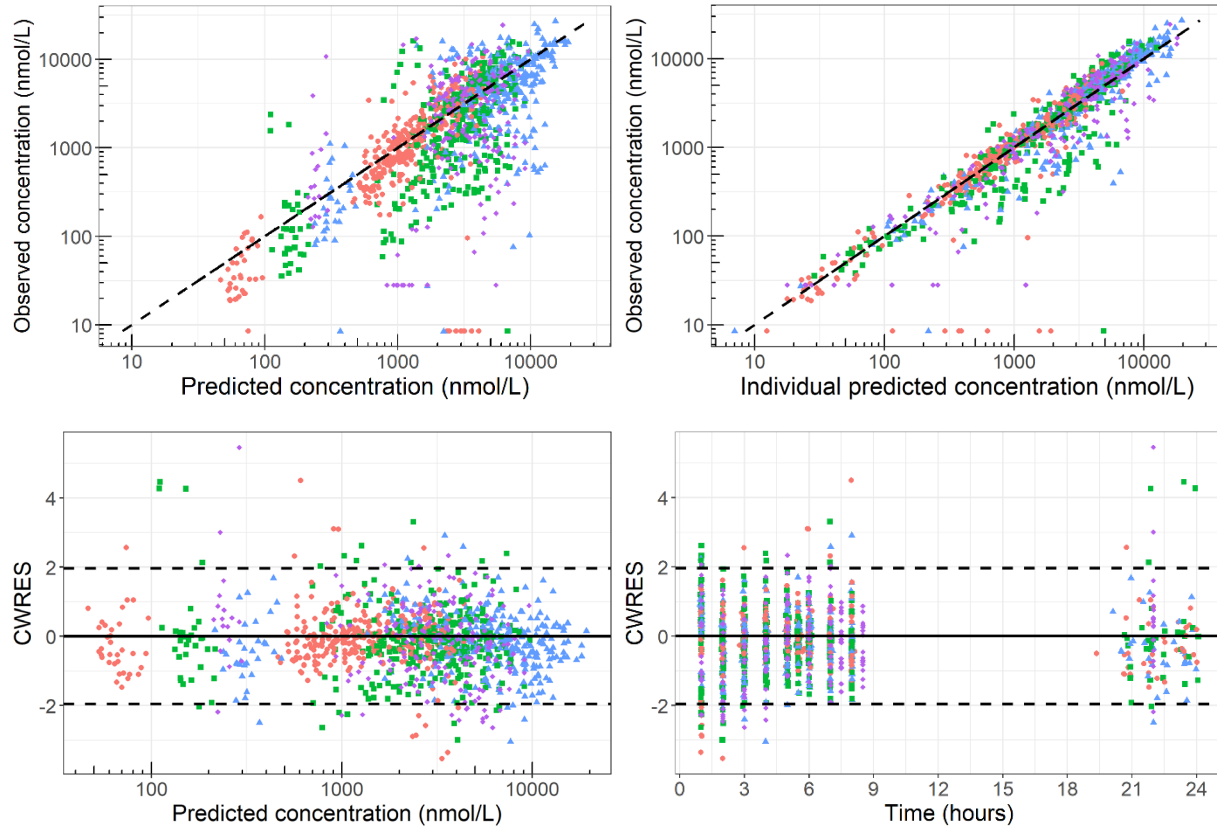

1

2

3

4

5

6

7

8

9

**Figure S2.** Goodness-of-fit plots of primary metabolite dADT, with population and individual predicted concentrations versus observed concentrations (top row) and conditionally weighted residuals (CWRES) versus predicted concentration and time after dose (bottom row). Colors and shape indicate different dose levels: 100 mg (red circle), 200 mg (green square), and 400 mg in school-aged children (blue triangle) and 400 mg in adolescents (purple diamond).

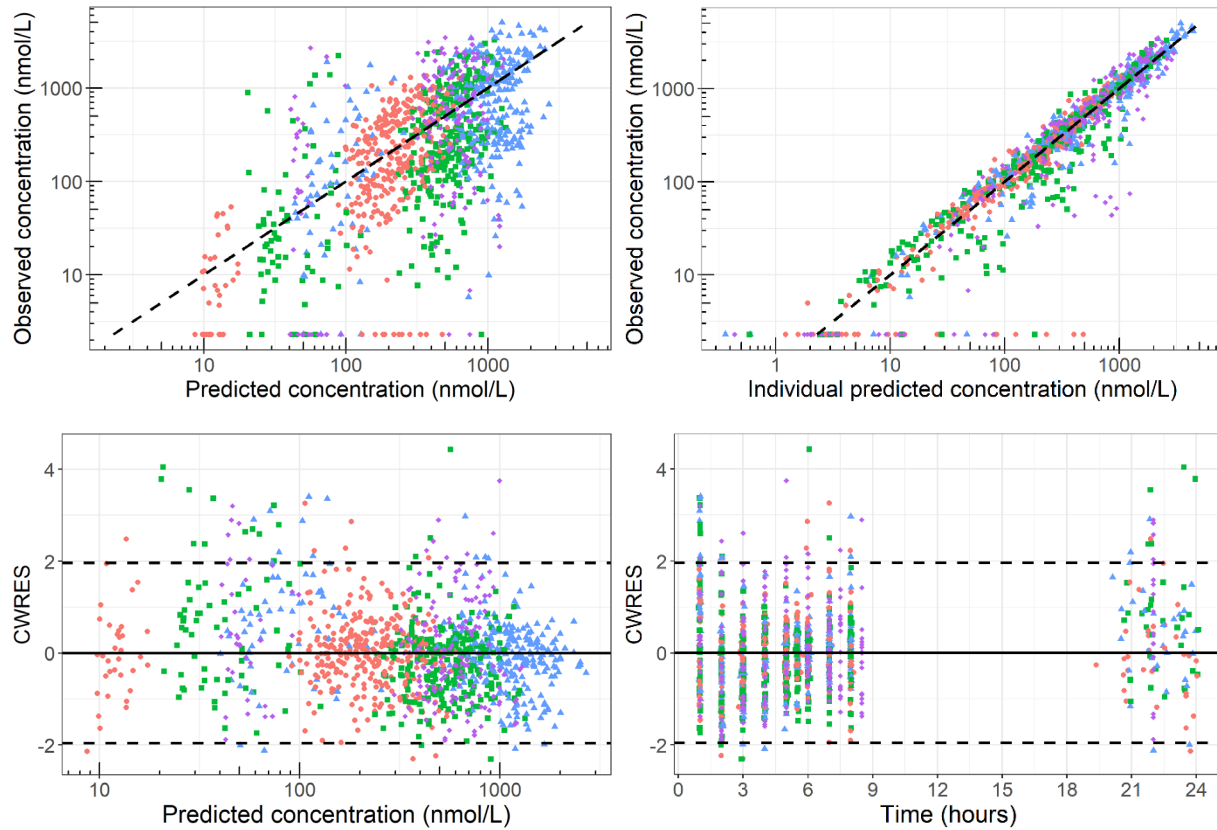

1

2

3

4

5

6

7

8

9

10

11

**Figure S3.** Goodness-of-fit plots of secondary metabolite adADT, with population and individual predicted concentrations versus observed concentrations (top row) and conditionally weighted residuals (CWRES) versus predicted concentration and time after dose (bottom row). Colors and shape indicate different dose levels: 100 mg (red circle), 200 mg (green square), and 400 mg in school-aged children (blue triangle) and 400 mg in adolescents (purple diamond).

1

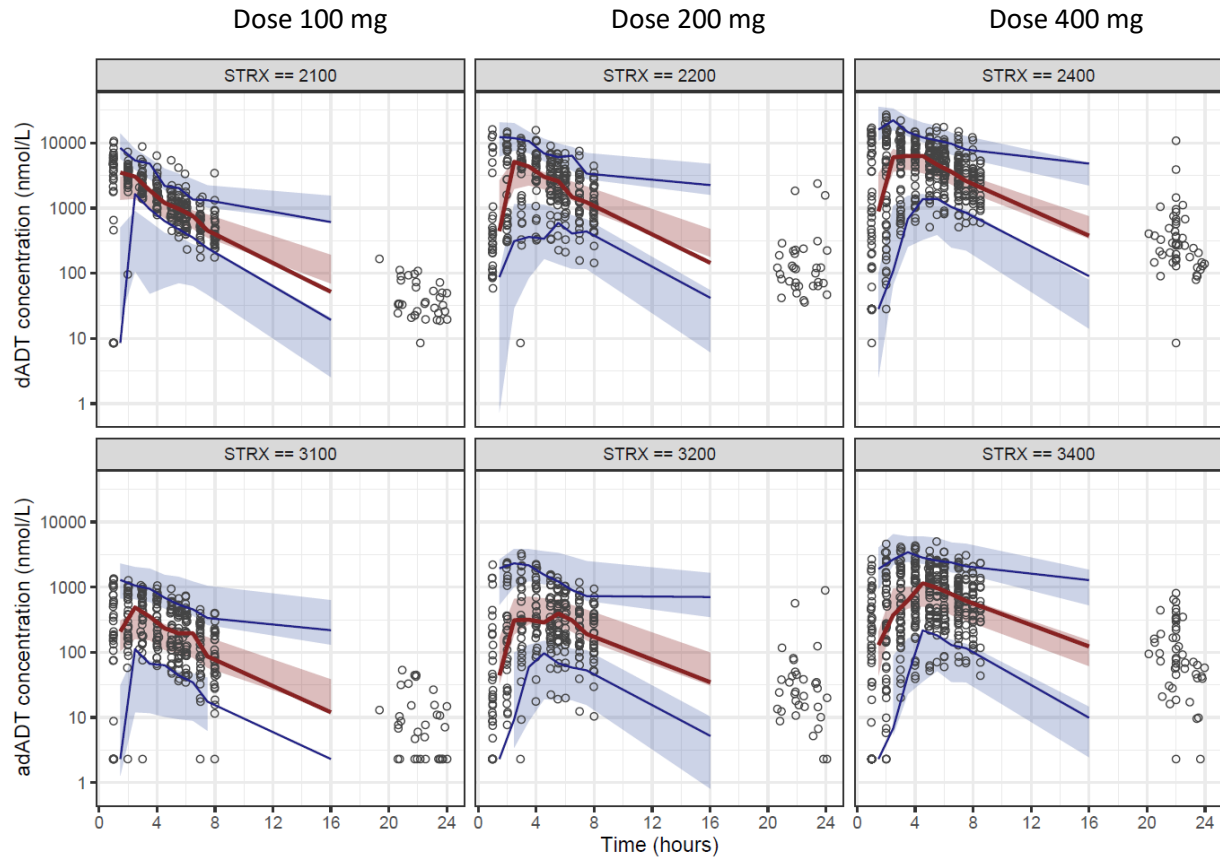

2

3 **Figure S4.** Visual predictive check (VPC) for dADT (top row) and adADT (bottom row), with observed (points  
4 and summarized in lines) and simulated (shaded areas, n=500) concentration over time in children and  
5 adolescents. Plots are stratified per dose level, with left: 100 mg (STRX 2100, 3100), middle: 200 mg (STRX  
6 2200, 3200), right: 400 mg (STRX 2400, 3400).

7

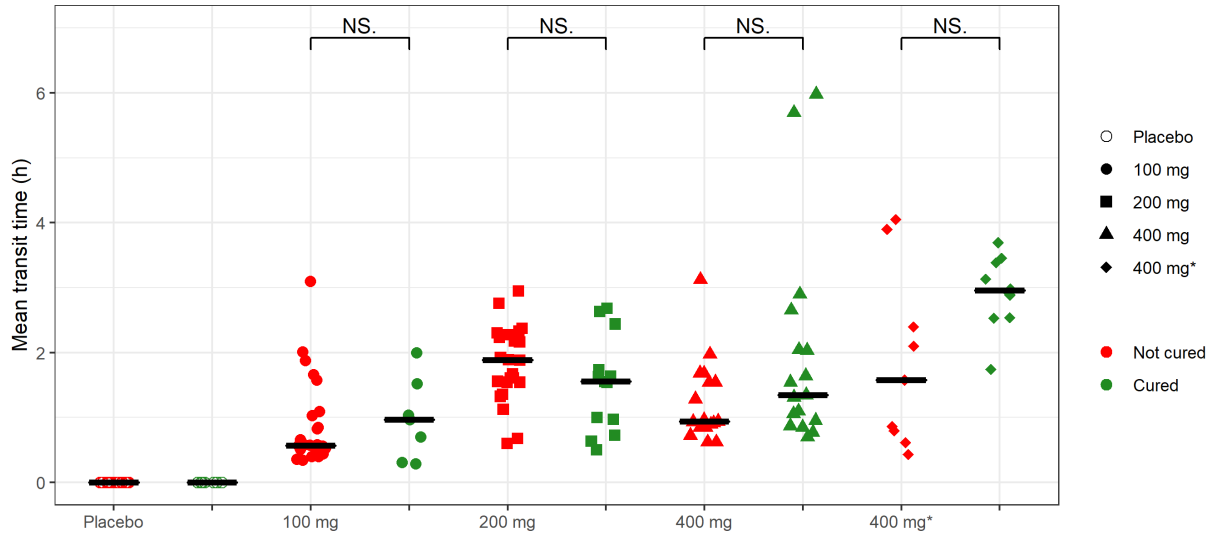

1  
 2 **Figure S5.** Intestinal residence time (reflected by mean transit time) *versus* response. Symbols represent  
 3 different dose arms (open circle: placebo, closed circle: 100 mg, square: 200 mg, triangle: 400 mg in school-  
 4 aged children, diamond: 400 mg in adolescents), and colors indicate study participants who are cured  
 5 (green), and who are not cured (red). \*Two groups of subjects received a 400 mg dose: school-aged children  
 6 “400 mg”, and adolescents who are indicated with an asterisk: “400 mg\*”. NS indicates no significant group  
 7 differences were observed in the independent 2-group Wilcoxon-Mann-Whitney test ( $p > 0.05$ ).

8  
 9



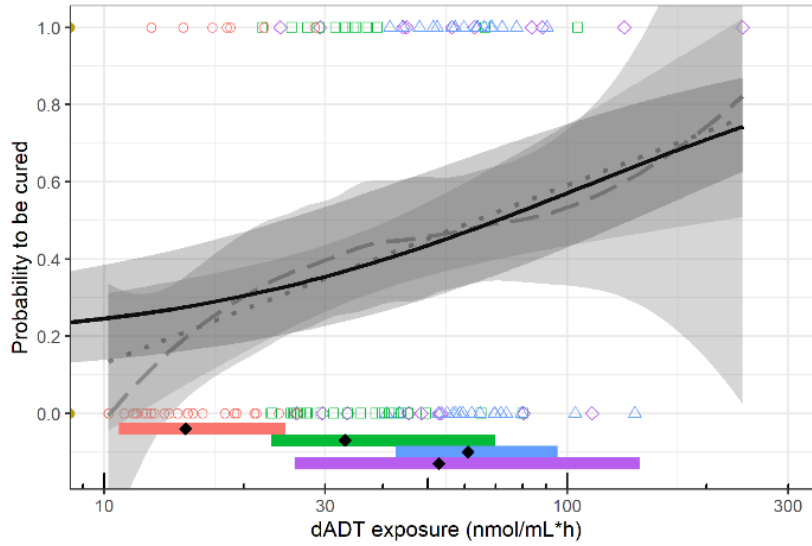

1

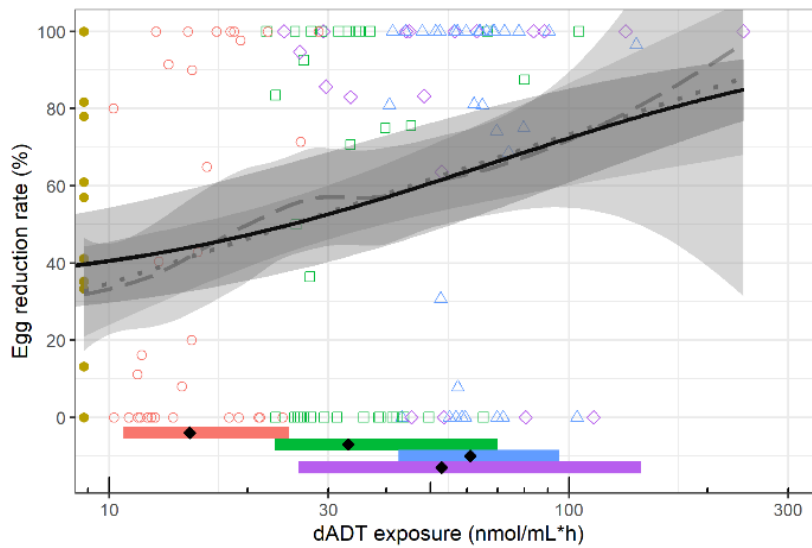

2

3 **Figure S6.** Evaluation of the exposure-response analysis. (A) dADT exposure versus probability to be cured.  
 4 (B) dADT exposure versus egg reduction rate. Colored symbols indicate individuals receiving different dose  
 5 levels, with yellow for placebo arm, red for 100 mg, green for 200 mg, blue for 400 mg in school-aged  
 6 children, and purple for 400 mg in adolescents. Black solid line: predicted model, with 80% confidence  
 7 interval (shaded area). The horizontal colored bars show the 90% confidence interval of exposure per dose  
 8 group with the black diamond indicating the median exposure per arm. The grey dashed (--) and dotted (···)  
 9 lines are smoothing functions, summarizing the data using a loess function and a linear model, respectively.

10

1 Tribendimidine

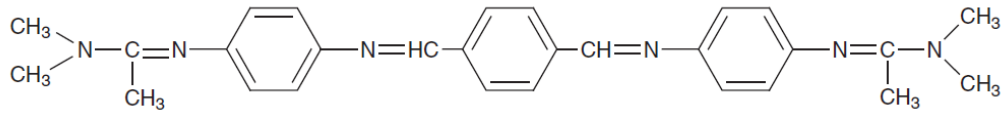

2

3

4 dADT

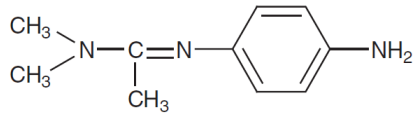

5

6

7 adADT

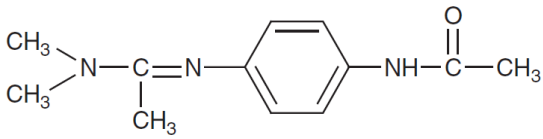

8

9 **Figure S7.** Molecular structures of the prodrug Tribendimidine, the active primary metabolite deacetylated  
10 amidantel (dADT) and the secondary metabolite, acetylated derivative of amidantel (adADT).

11
